# Supplementary material for: CARD3 Promotes Cerebral Ischemia‐Reperfusion Injury Via Activation of TAK1
Source: PubMed Central journal article supplement — J Am Heart Assoc. 2020 Apr 30;9(9):e014920. doi: 10.1161/JAHA.119.014920 (PMC7428569; doi:10.1161/jaha.119.014920), 2020-04-30

# **SUPPLEMENTAL MATERIAL**

**Table S1. Neurological impairment evaluation scale.**

| <b>Neurological deficits</b>                                                                   | <b>Scores</b> |
|------------------------------------------------------------------------------------------------|---------------|
| No observable neurological damage                                                              | 0             |
| Failure to fully extend the right forepaw or flex the left forelimb when suspended by the tail | 1             |
| Left shoulder adduction when suspended by the tail                                             | 2             |
| Reduced resistance to a lateral push toward the left                                           | 3             |
| Moving spontaneously but turning to the left when dragged by the tail                          | 4             |
| Rotating spontaneously or only to the left                                                     | 5             |
| Moving only in response to stimulus                                                            | 6             |
| No movement in response to stimulus                                                            | 7             |
| Death resulting from stroke                                                                    | 8             |

**Table S2. Antibody information for Western blotting.**

| <b>Anti-body Name</b> | <b>Source</b>             | <b>Catalog<br/>Number</b> | <b>RRID</b> |
|-----------------------|---------------------------|---------------------------|-------------|
| CARD3                 | Cell Signaling Technology | #4142                     | AB_2716277  |
| Bcl-2                 | Cell Signaling Technology | #3498                     | AB_1903907  |
| Bax                   | Cell Signaling Technology | #2772                     | AB_10695870 |
| Bid                   | Cell Signaling Technology | #2003                     | AB_10694562 |
| cleaved-caspase3      | Cell Signaling Technology | #9661                     | AB_2341188  |
| p-ERK                 | Cell Signaling Technology | #4370                     | AB_2315112  |
| ERK                   | Cell Signaling Technology | #4695                     | AB_390779   |
| p-JNK                 | Cell Signaling Technology | #4668                     | AB_823588   |
| JNK                   | Cell Signaling Technology | #9258                     | AB_2141027  |
| p-p38                 | Cell Signaling Technology | #4511                     | AB_2139682  |
| p38                   | Cell Signaling Technology | #9212                     | AB_330713   |
| IKBa                  | Cell Signaling Technology | #4814                     | AB_390781   |
| p-IKK $\beta$         | Cell Signaling Technology | #2694                     | AB_2122296  |
| IKK $\beta$           | Cell Signaling Technology | #8943                     | AB_11024092 |
| p-p65                 | Cell Signaling Technology | #3033                     | AB_331284   |
| p65                   | Cell Signaling Technology | #4764                     | AB_823578   |
| TAK1                  | Cell Signaling Technology | #5206                     | AB_10694079 |
| p-TAK1                | Cell Signaling Technology | #9339                     | AB_2140096  |
| GAPDH                 | Cell Signaling Technology | #2118                     | AB_561053   |

|                 |                        |             |             |
|-----------------|------------------------|-------------|-------------|
| Anti-Mouse IgG  | Jackson ImmunoResearch | #115-035-00 | AB_10015289 |
| H+L             | Labs                   | 3           |             |
| Anti-Rabbit IgG | Jackson ImmunoResearch | #111-035-00 | AB_2313567  |
| H+L             | Labs                   | 3           |             |

---

**Table S3. Primer sequences for PCR.**

| <b>Gene</b>                    | <b>Forward</b>        | <b>Reverse</b>        |
|--------------------------------|-----------------------|-----------------------|
| <i>TNF-<math>\alpha</math></i> | TGACAAGCCTGTAGCCCAC   | TAGCAAATCGGCTGACGGTG  |
| <i>COX-2</i>                   | TCTCCCTGAAGCCGTACACA  | AATGGTGCTCCAAGCTCTACC |
| <i>IL-1<math>\beta</math></i>  | TAATGAAAGACGGCACACCCA | GTTTCCCAGGAAGACAGGCT  |
| <i>IL-6</i>                    | ATGAACTTGGACCTCTGCGG  | GTCCACCACAGTTGCTGACT  |
| <i>GAPDH</i>                   | GGTTGTCTCCTGCGACTTCA  | CCCTGTTGCTGTAGCCGTAT  |

**Figure S1. The rCBF (relative cerebral blood flow) of the different tMCAO (transient middle cerebral artery occlusion model) mice model was measured by a Doppler flowmeter (A). The expression of CARD3 in different tissues from CARD3-TG mice was measured by western blotting (B), GAPDH (glyceraldehyde-3-phosphate dehydrogenase) served as loading control. (C), in vivo, the mRNA levels of apoptotic factors in WT and CARD3-KO mice or NTG and neuron-specific CARD3-TG mice after reperfusion for 24 h were analyzed with qPCR. All data were normalized to GAPDH and shown as mean  $\pm$  SD. Comparison between groups were performed with Student's t-test, \* $p$ <0.05 vs the control group,  $n=4$  mice per group. (D), in vitro, primary neurons separated from CARD3-KO or -TG mice were subjected to OGD (oxygen and glucose deprivation) for 1 hour and reperfusion for 24h. The mRNA levels of the inflammatory-related factors were analyzed with qPCR. All data were normalized to GAPDH and shown as mean  $\pm$  SD. Comparison between groups were performed with Student's t-test, \* $p$ <0.05 vs the control group. Three independent experiments were repeated. Bcl2 indicates B-cell lymphoma-2; Bax, Bcl2-Associated X; TNF- $\alpha$ , tumour necrosis factor alpha; COX-2, cyclooxygenase-2; IL-1 $\beta$ , interleukin-1 $\beta$ ; IL-6, interleukin-6.**

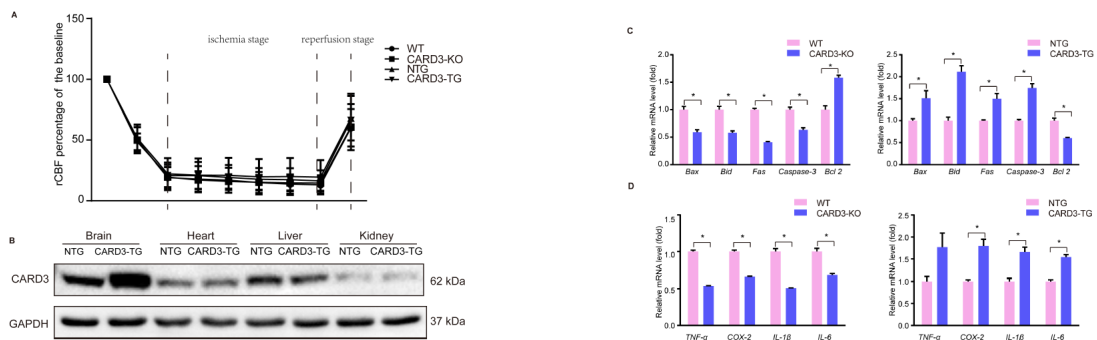

Supplement: JAH3-9-e014920-s001.pdf [file JAH3-9-e014920-s001.pdf]
